# Supplementary material for: Association of Circulating Adipokines With Echocardiographic Measures of Cardiac Structure and Function in a Community‐Based Cohort
Source: PubMed Central journal article supplement — J Am Heart Assoc. 2018 Jun 21;7(13):e008997. doi: 10.1161/JAHA.118.008997 (PMC6064918; doi:10.1161/jaha.118.008997), 2018-06-21
Supplement: JAH3-7-e008997-s001.pdf [file JAH3-7-e008997-s001.pdf]

# **Supplemental Material**

**Table S1. Associations between circulating adipokine concentrations and echocardiographic indices: adjusted for BMI instead of height and weight.**

|             | Cardiac structural measures     |                    |                                      |                | Left ventricular function measures |         |          |                |
|-------------|---------------------------------|--------------------|--------------------------------------|----------------|------------------------------------|---------|----------|----------------|
|             | Log left ventricular mass Index |                    | Left atrial dimension at end-systole |                | Fractional shortening              |         | Log E/e' |                |
|             | Estimate                        | p value            | Estimate                             | p value        | Estimate                           | p value | Estimate | p value        |
| Leptin      | -0.035                          | <b>&lt;0.0001*</b> | -0.032                               | <b>0.0005*</b> | 0.005                              | 0.95    | 0.008    | 0.17           |
| LR          | 0.007                           | 0.0097             | 0.004                                | 0.51           | -0.105                             | 0.09    | -0.016   | <b>0.0002*</b> |
| FLI         | -0.022                          | <b>&lt;0.0001*</b> | -0.022                               | 0.0082         | 0.046                              | 0.55    | 0.013    | 0.007          |
| FABP4       | -0.018                          | <b>&lt;0.0001*</b> | -0.006                               | 0.42           | 0.044                              | 0.55    | 0.002    | 0.73           |
| RBP4        | 0.012                           | <b>0.0001*</b>     | 0.025                                | <b>0.0002*</b> | -0.067                             | 0.30    | -0.007   | 0.11           |
| Fetuin-A    | -0.001                          | 0.60               | -0.005                               | 0.41           | 0.113                              | 0.04    | 0.005    | 0.15           |
| Adiponectin | -0.0006                         | 0.83               | 0.011                                | 0.10           | -0.063                             | 0.32    | 0.004    | 0.30           |

Estimates are beta coefficients per sex-standardized 1 standard deviation increase for each adipokine.

Models are adjusted for cohort, age, sex, BMI, systolic blood pressure, diastolic blood pressure, heart rate, diabetes, anti-hypertensive treatment, smoking, serum creatinine, high density lipoprotein, low density lipoprotein, triglycerides.

\* Bonferroni corrected  $p \leq 0.002$ .

FABP: Fatty Acid-Binding Protein; FLI: Free Leptin index; LR: Leptin receptor; RBP: Retinol-Binding Protein.

**Table S2. Secondary analysis of associations between adipokine levels and the components of LVMI and LV end-systolic dimensions.**

|             | Left ventricular diastolic dimension |                    | Left ventricular systolic dimension |                    | Left ventricular wall thickness |                    |
|-------------|--------------------------------------|--------------------|-------------------------------------|--------------------|---------------------------------|--------------------|
|             | Estimate                             | p-value            | Estimate                            | p-value            | Estimate                        | p-value            |
| Leptin      | -0.066                               | <b>&lt;0.0001*</b> | -0.044                              | <b>&lt;0.0001*</b> | -0.021                          | <b>0.0003*</b>     |
| LR          | -0.004                               | 0.44               | 0.003                               | 0.57               | 0.014                           | <b>&lt;0.0001*</b> |
| FLI         | -0.035                               | <b>&lt;0.0001*</b> | -0.025                              | <b>&lt;0.0001*</b> | -0.017                          | <b>&lt;0.0001*</b> |
| FABP4       | -0.030                               | <b>&lt;0.0001*</b> | -0.022                              | <b>0.0002*</b>     | -0.014                          | <b>0.0001*</b>     |
| RBP4        | 0.019                                | <b>0.0009*</b>     | 0.016                               | <b>0.002*</b>      | 0.008                           | 0.008              |
| Fetuin-A    | -0.0002                              | 0.96               | -0.006                              | 0.17               | -0.002                          | 0.42               |
| Adiponectin | 0.001                                | 0.83               | 0.003                               | 0.50               | -0.003                          | 0.38               |

Estimates are beta coefficients per 1 standard deviation increase for each sex-standardized adipokine.

Models are adjusted for cohort, age, sex, height, weight, systolic blood pressure, diastolic blood pressure, heart rate, diabetes, anti-hypertensive treatment, smoking, serum creatinine, high density lipoprotein, low density lipoprotein, triglycerides

\* Bonferroni corrected p value:  $p \leq 0.002$ .

FABP: Fatty Acid-Binding Protein; FLI: Free Leptin index; LR: Leptin receptor; RBP: Retinol-Binding Protein.

**Table S3. Associations of circulating adipokine concentrations and echocardiographic indices stratified by sex-specific median weight.**

|                                          | Overall sample |                    | Stratified by sex-specific median |          |         |
|------------------------------------------|----------------|--------------------|-----------------------------------|----------|---------|
|                                          | Estimate       | p-value            | Stratum                           | Estimate | p-value |
| <b>Left ventricular mass Index</b>       |                |                    |                                   |          |         |
| LR                                       | 0.009          | <b>0.002</b>       | <median weight                    | 0.008    | 0.0263  |
|                                          |                |                    | ≥median weight                    | 0.011    | 0.0095  |
| FABP4                                    | -0.019         | <b>&lt;0.0001*</b> | <median weight                    | -0.035   | <0.0001 |
|                                          |                |                    | ≥median weight                    | -0.011   | 0.0026  |
| <b>Left atrial end-systolic diameter</b> |                |                    |                                   |          |         |
| Leptin                                   | -0.039         | <b>&lt;0.0001*</b> | <median weight                    | -0.062   | 0.0046  |
|                                          |                |                    | ≥median weight                    | -0.028   | 0.0053  |

Estimates are beta coefficients per sex-standardized 1 standard deviation increase for each adipokine. See Table 1 for sex-specific median weight.

Models are adjusted for cohort, age, sex, height, weight, systolic blood pressure, diastolic blood pressure, heart rate, diabetes, anti-hypertensive treatment, smoking, serum creatinine, high density lipoprotein, low density lipoprotein, triglycerides.

\* Bonferroni corrected  $p \leq 0.002$

FABP: Fatty Acid-Binding Protein; LR: Leptin receptor.

**Figure S1. Least square means of E/e' according to sex-specific tertile of circulating concentrations of soluble leptin receptor.**

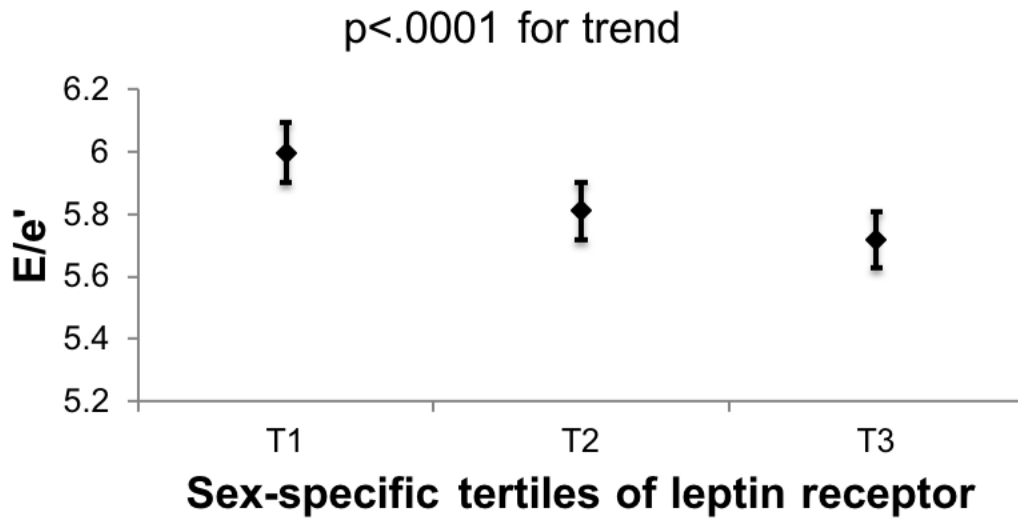

Least squares means and their standard errors of E/e' according to sex-specific tertiles of leptin receptor, adjusted for cohort, age, sex, height, weight, systolic blood pressure, diastolic blood pressure, heart rate, diabetes, anti-hypertensive treatment, smoking, serum creatinine, high density lipoprotein, low density lipoprotein, triglycerides.
